# Supplementary material for: Radiolytic Synthesis of Pt-Particle/ABS Catalysts for H2O2 Decomposition in Contact Lens Cleaning
Source: MDPI journal article supplement (doi:10.3390/nano7090235), 2017-08-23

# Supplementary Materials

## **Radiolytic Synthesis of Pt-particle/ABS catalysts for H<sub>2</sub>O<sub>2</sub> decomposition in contact lens cleaning**

Yuji Ohkubo <sup>1,\*</sup>, Tomonori Aoki <sup>1</sup>, Satoshi Seino <sup>2</sup>, Osamu Mori <sup>2</sup>, Issaku Ito <sup>2</sup>, Katsuyoshi Endo <sup>1</sup> and Kazuya Yamamura <sup>1</sup>

<sup>1</sup> Graduate School of Engineering, Osaka University, 2-1 Yamadaoka, Suita, Osaka 565-0871, Japan  
[Tel and Fax: +81-6-6879-7294, and E-mail: okubo@upst.eng.osaka-u.ac.jp]

<sup>2</sup> Menicon Co., Ltd, 5-1-10 Takamori-dai, Kasugai, Aichi 487-0032, Japan

### **Contents**

|                                                                                           |    |
|-------------------------------------------------------------------------------------------|----|
| ● Calibration curve for calculating the amounts of Pt .....                               | S1 |
| ● Photographs of the coloration of peroxotitanium complex .....                           | S2 |
| ● Calibration curve for calculating the H <sub>2</sub> O <sub>2</sub> concentration ..... | S3 |

**Figure S1** Calibration curve for calculating the amounts of Pt on the Pt-particle/ABS samples: relation between Pt concentration and emission intensity.

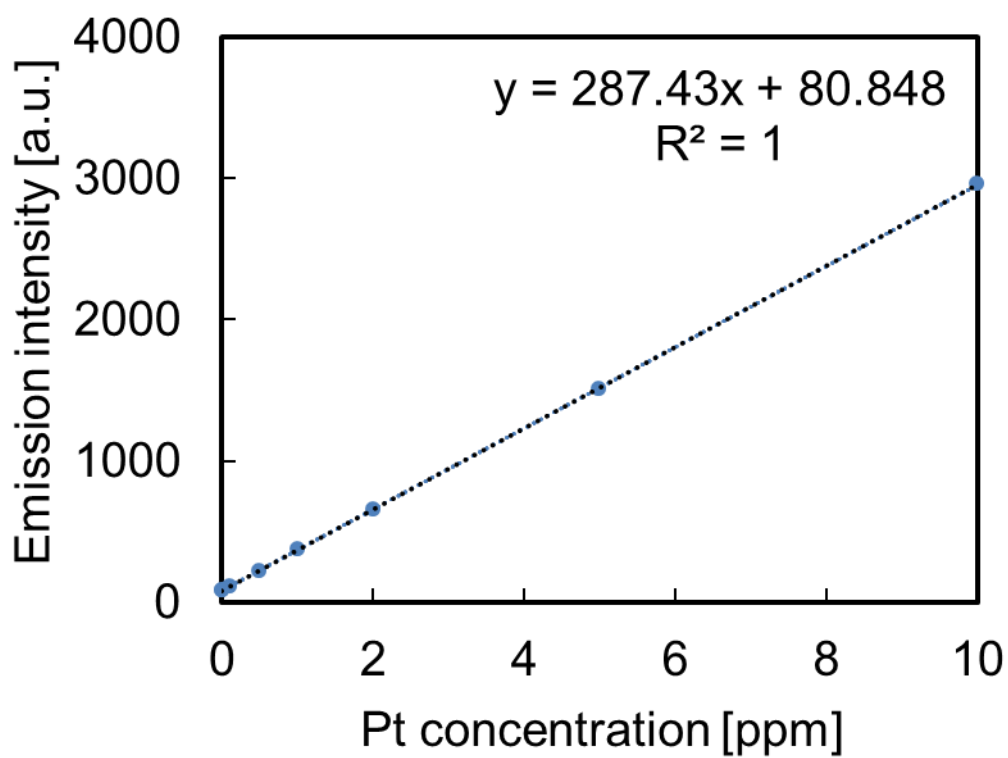

**Figure S2** Photographs of the coloration of peroxotitanium complex: relation between  $\text{H}_2\text{O}_2$  concentration and the color of peroxotitanium complex.

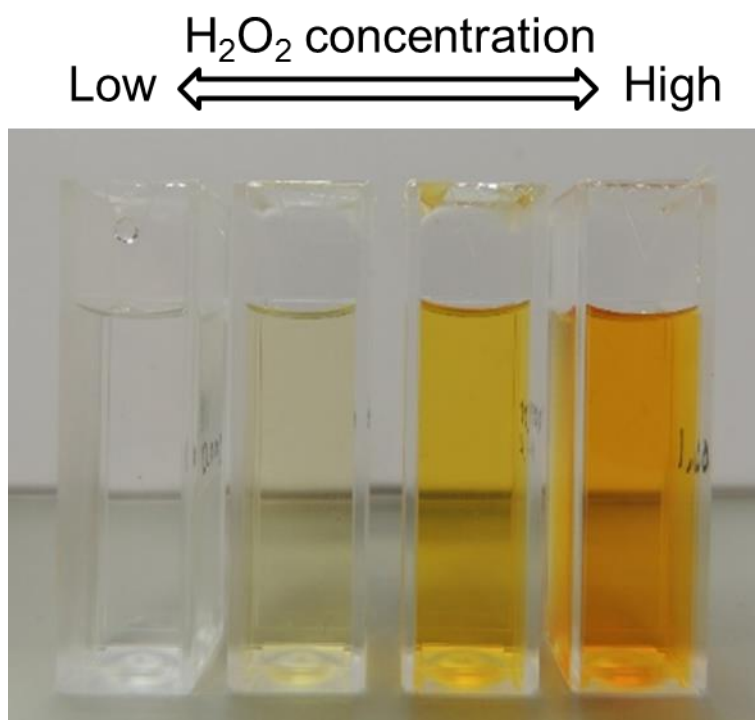

**Figure S3** Calibration curve for calculating the H<sub>2</sub>O<sub>2</sub> concentration: relation between H<sub>2</sub>O<sub>2</sub> concentration and absorbance at 407 nm.

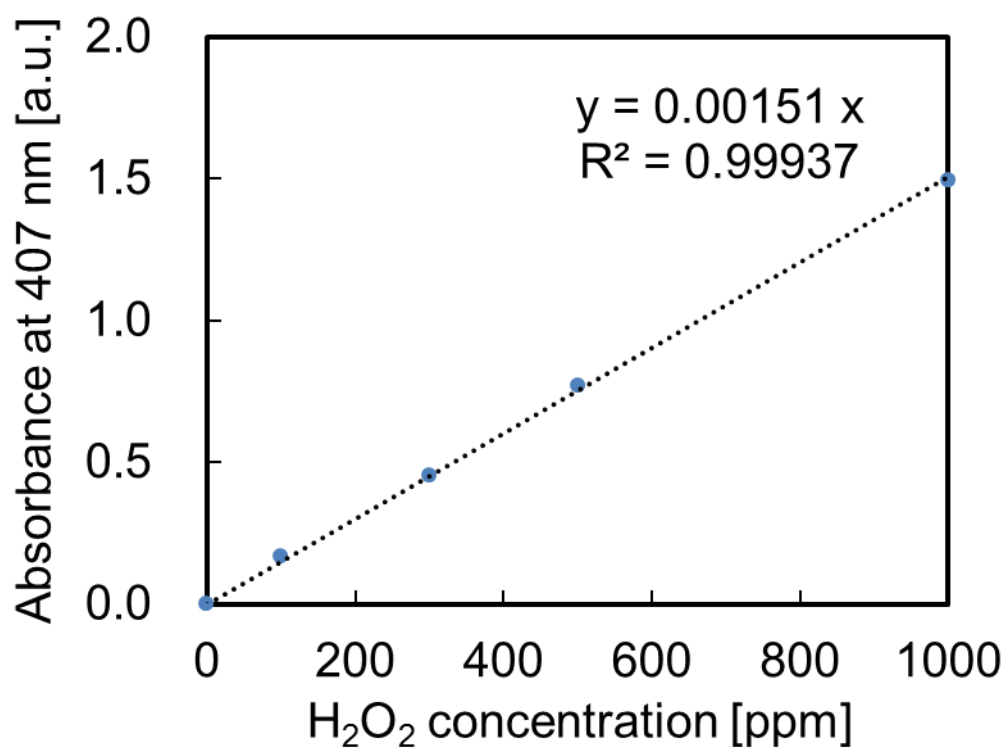

Supplement: s1 [file s1]
